# Supplementary material
Source: HighWire-hosted journal article supplement (https://erj.ersjournals.com/content/50/6/1700919)
Supplement: inline-supplementary-material-1 [file inline-supplementary-material-1.pdf]

Figure S1: Visual representation of the peak P3

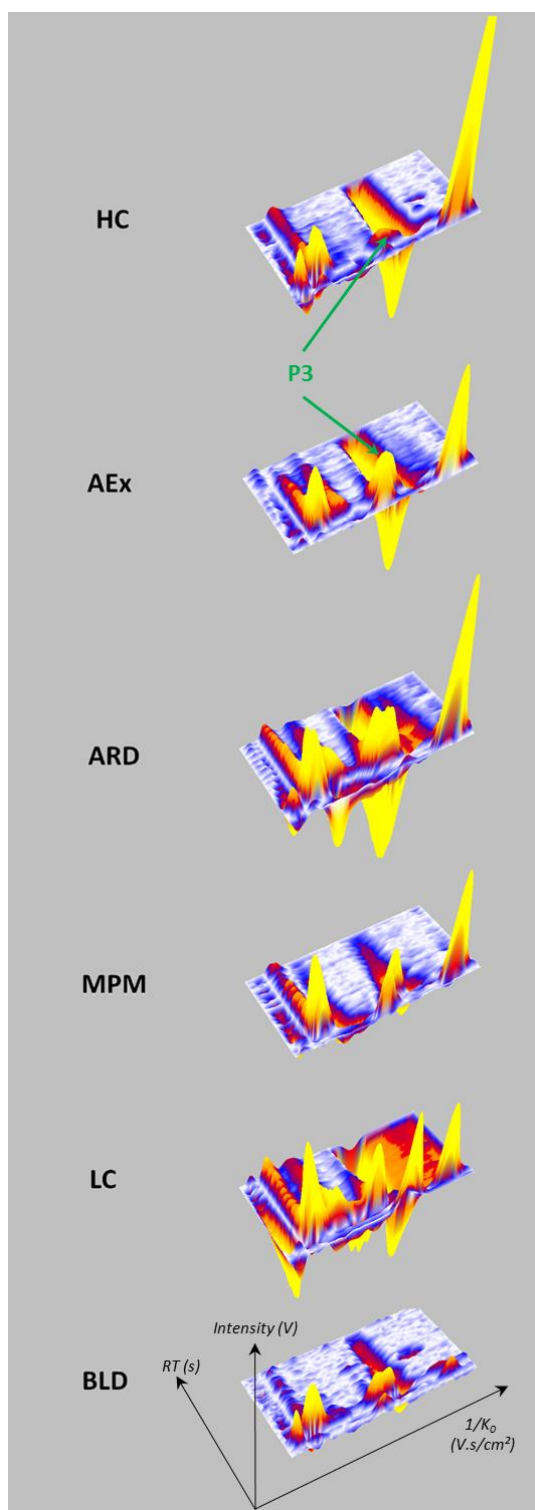

AEx: asymptomatic former asbestos-exposed individual. ARD: patients with benign asbestos-related diseases. BLD: patients with benign non-asbestos related lung diseases. HC: Healthy control. LC: primary lung cancer patients. MPM: malignant pleural mesothelioma patients. RT: retention time. s: second. V: Volt.  $1/K_0$ : inverse reduced ion mobility.
